# Supplementary material for: Seed Characterization and Evaluation of Pre-Germinative Barriers in the Genus Alstroemeria (Alstroemeriaceae)
Source: MDPI journal article supplement (doi:10.3390/seeds2040035), 2023-11-28
Supplement: s1 [file s1]

## Supplementary Materials

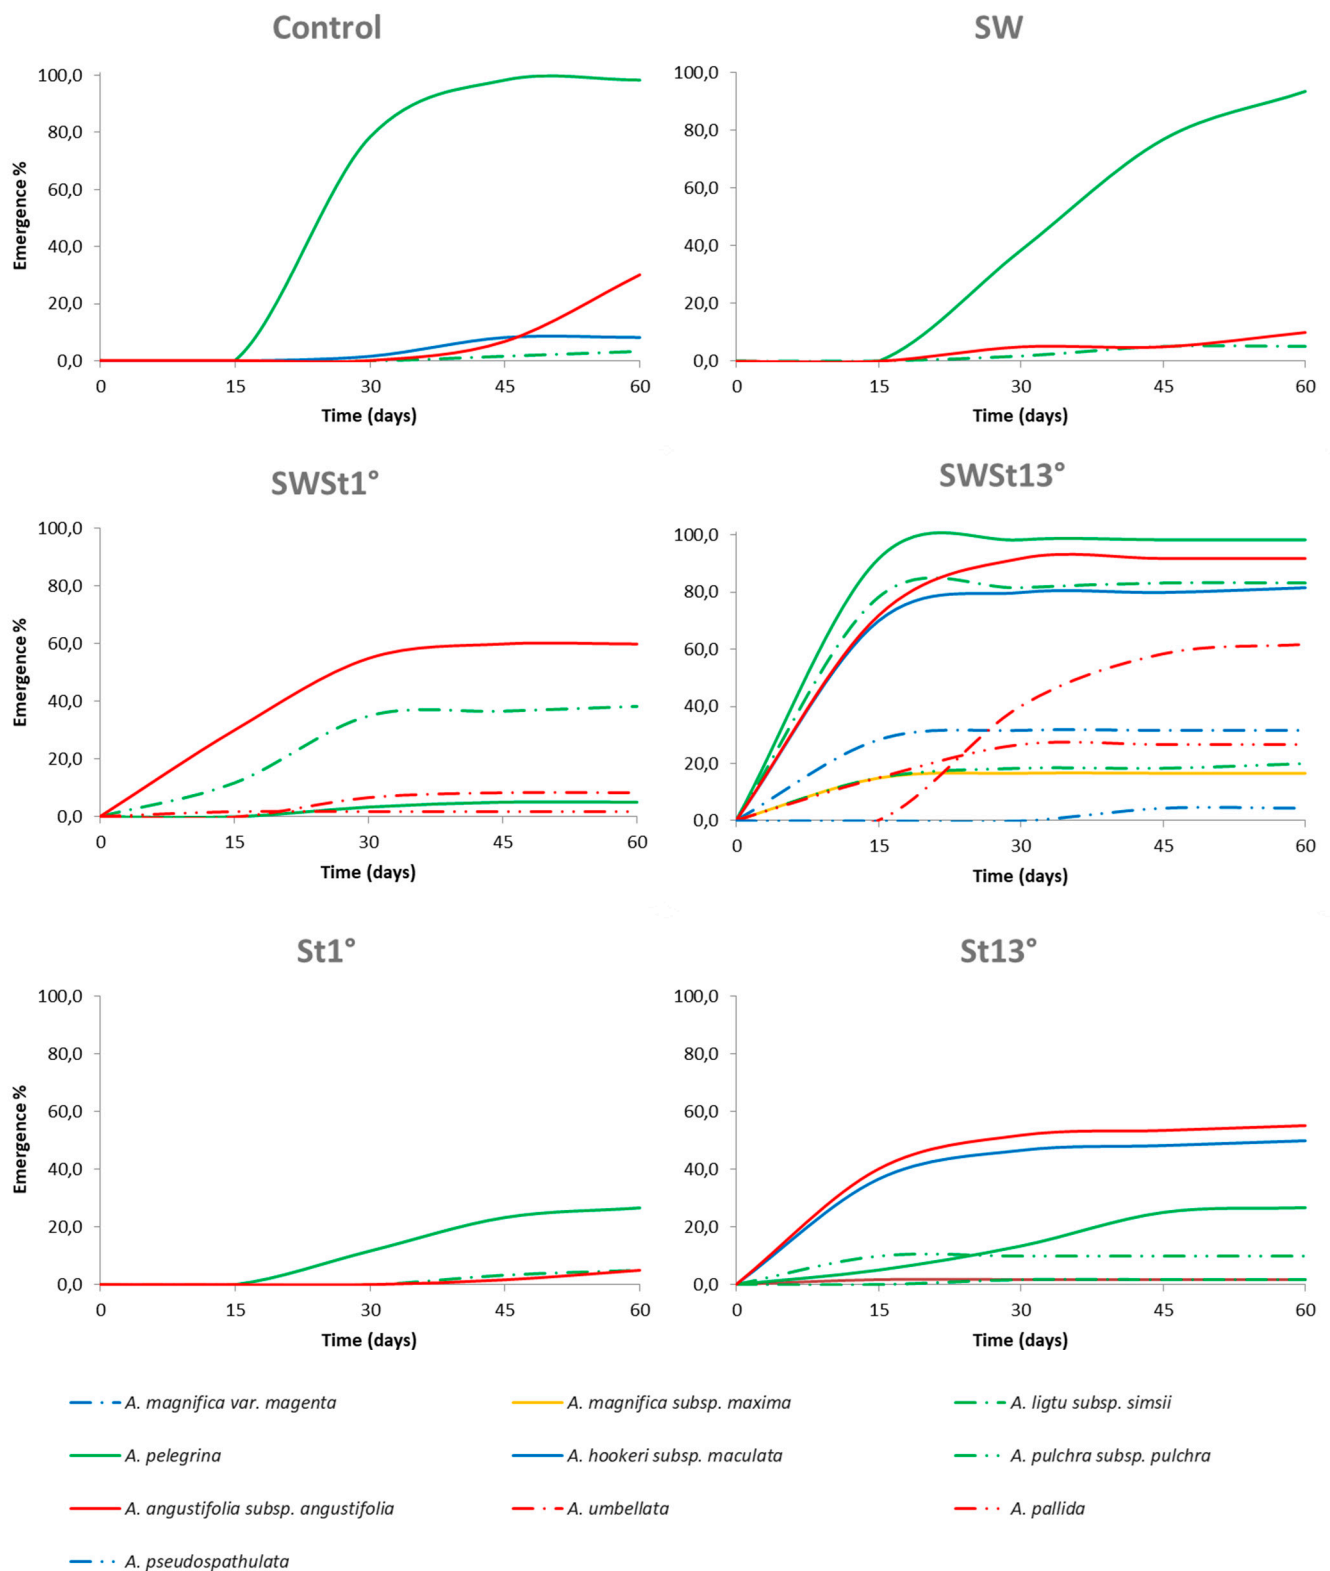

**Figure S1.** Accumulated emergence (%) of the ten *Alstroemeria* species that were subjected to the different pre-germinative treatments. (SW: Soaking water; SWSt1°C: Soaking water and cold stratification at 1°C; SWSt13°C: Soaking water and cold stratification at 13 °C; St1°C: Cold stratification at 1 °C; St13°C: Cold stratification at 13 °C).

**Table S1.** Geoclimatic data of the locations where *Alstroemeria* seeds were collected.

| Alstroemeria species*                             | Altitude<br>(masl) | Mean<br>Temperature<br>(°C) | Max<br>Temperature<br>(°C) | Min<br>Temperature<br>(°C) | Precipitation<br>(mm) |
|---------------------------------------------------|--------------------|-----------------------------|----------------------------|----------------------------|-----------------------|
| <i>A. angustifolia</i> subsp. <i>angustifolia</i> | 2216               | 8.4                         | 22.7                       | -3.2                       | 620                   |
| <i>A. hookeri</i> subsp. <i>maculata</i>          | 17                 | 17.0                        | 27.0                       | 8.1                        | 210                   |
| <i>A. ligtu</i> subsp. <i>simsii</i>              | 557                | 13.9                        | 28.5                       | 2.5                        | 406                   |
| <i>A. magnifica</i> var. <i>magenta</i>           | 7                  | 17.0                        | 27.0                       | 8.1                        | 210                   |
| <i>A. magnifica</i> subsp. <i>maxima</i>          | 664                | 13.3                        | 27.7                       | 2.2                        | 452                   |
| <i>A. pallida</i>                                 | 2547               | 7.1                         | 20.7                       | -3.7                       | 491                   |
| <i>A. pelegrina</i> L.                            | 8                  | 17.0                        | 27.0                       | 8.1                        | 210                   |
| <i>A. pseudospathulata</i>                        | 1880               | 6.6                         | 21.8                       | -4.0                       | 963                   |
| <i>A. pulchra</i> subsp. <i>pulchra</i>           | 682                | 13.3                        | 27.7                       | 2.2                        | 452                   |
| <i>A. umbellata</i>                               | 2739               | 5.5                         | 18.9                       | -5.4                       | 490                   |

\* Accepted names according to GBIF (<https://www.gbif.org/>)

**Table S2.** Size (diameter) and mass (of 100 seeds) of alstroemeria seeds.

| <i>Alstroemeria</i> species                                      | Diameter (mm) |     | 100 seeds mass (g) |    |
|------------------------------------------------------------------|---------------|-----|--------------------|----|
|                                                                  | mean ± SE     |     | mean ± SE          |    |
| <i>A. angustifolia</i> subsp. <i>angustifolia</i>                | 2.94 ± 0.05   | BC  | 1.86 ± 0.02        | D  |
| <i>A. hookeri</i> subsp. <i>maculata</i> Ehr.Bayer               | 2.47 ± 0.05   | DEF | 1.28 ± 0.01        | F  |
| <i>A. ligtu</i> subsp. <i>simsii</i> (Spreng.) Ehr.Bayer         | 3.27 ± 0.08   | AB  | 3.11 ± 0.05        | A  |
| <i>A. magnifica</i> var. <i>magenta</i> (Ehr.Bayer) Muñoz-Schick | 2.29 ± 0.03   | EF  | 0.90 ± 0.02        | G  |
| <i>A. magnifica</i> subsp. <i>maxima</i> (Phil.) Ehr.Bayer       | 2.84 ± 0.05   | BCD | 1.68 ± 0.01        | E  |
| <i>A. pallida</i> Graham                                         | 2.63 ± 0.06   | CDE | 1.72 ± 0.03        | DE |
| <i>A. pelegrina</i> L.                                           | 3.43 ± 0.03   | A   | 2.64 ± 0.02        | B  |
| <i>A. pseudospathulata</i> Ehr.Bayer                             | 2.95 ± 0.05   | BC  | 2.18 ± 0.07        | C  |
| <i>A. pulchra</i> subsp. <i>pulchra</i>                          | 2.18 ± 0.05   | F   | 0.99 ± 0.01        | G  |
| <i>A. umbellata</i> Meyen                                        | 3.22 ± 0.06   | AB  | 2.99 ± 0.03        | A  |

**Table S3.** Maximum % of emergence and number of days to reach it on ten *Alstroemeria* species that were subjected to the different pre-germinative treatments. (SW: Soaking water; SWSt1°C: Soaking water and cold stratification at 1°C; SWSt13°C: Soaking water and cold stratification at 13 °C; St1°C: Cold stratification at 1 °C; St13°C: Cold stratification at 13 °C).

| <i>Alstroemeria</i> species*                                     | Control |        | SW    |        | SWSt1° |        | SWSt13° |        | St1°  |        | St13° |        |
|------------------------------------------------------------------|---------|--------|-------|--------|--------|--------|---------|--------|-------|--------|-------|--------|
|                                                                  | %*      | Days** | %*    | Days** | %*     | Days** | %*      | Days** | %*    | Days** | %*    | Days** |
| <i>A. angustifolia</i> subsp. <i>angustifolia</i>                | 30.00   | 48.83  | 10.00 | 39.17  | 60.00  | 17.44  | 91.67   | 11.40  | 5.00  | 34.33  | 55.00 | 13.39  |
| <i>A. hookeri</i> subsp. <i>maculata</i> Ehr.Bayer               | 8.33    | 41.83  | 0.00  | 0.00   | 0.00   | 0.00   | 81.67   | 10.24  | 0.00  | 0.00   | 50.00 | 11.51  |
| <i>A. ligtu</i> subsp. <i>simzii</i> (Spreng.) Ehr.Bayer         | 3.33    | 33.67  | 5.00  | 27.17  | 38.33  | 20.00  | 83.33   | 10.06  | 5.00  | 29.17  | 1.67  | 6.00   |
| <i>A. magnifica</i> var. <i>magenta</i> (Ehr.Bayer) Muñoz-Schick | 0.00    | 0.00   | 0.00  | 0.00   | 0.00   | 0.00   | 31.67   | 10.27  | 0.00  | 0.00   | 0.00  | 0.00   |
| <i>A. magnifica</i> subsp. <i>maxima</i> (Phil.) Ehr.Bayer       | 0.00    | 0.00   | 0.00  | 0.00   | 0.00   | 0.00   | 16.67   | 11.28  | 0.00  | 0.00   | 1.67  | 4.67   |
| <i>A. pallida</i> Graham                                         | 0.00    | 0.00   | 0.00  | 0.00   | 1.67   | 5.00   | 26.67   | 12.65  | 0.00  | 0.00   | 0.00  | 0.00   |
| <i>A. pelegrina</i> L.                                           | 98.33   | 29.23  | 93.33 | 37.90  | 5.00   | 8.44   | 98.33   | 8.69   | 26.67 | 35.96  | 26.67 | 32.02  |
| <i>A. pseudospathulata</i> Ehr.Bayer                             | 0.00    | 0.00   | 0.00  | 0.00   | 0.00   | 0.00   | 4.45    | 27.33  | 0.00  | 0.00   | 0.00  | 0.00   |
| <i>A. pulchra</i> subsp. <i>pulchra</i>                          | 0.00    | 0.00   | 0.00  | 0.00   | 0.00   | 0.00   | 20.00   | 13.42  | 0.00  | 0.00   | 10.00 | 7.00   |
| <i>A. umbellata</i> Meyen                                        | 1.67    | 16.33  | 0.00  | 0.00   | 8.33   | 30.67  | 61.67   | 29.32  | 0.00  | 0.00   | 0.00  | 0.00   |

\* Average of the maximum % of emergence observed

\*\* Average number of days to reach the maximum % of emergence
